# Supplementary material
Source: PubMed Central journal article supplement (PMC6170730)
Supplement: NIHMS957750-supplement-supplement_1.pdf [file NIHMS957750-supplement-supplement_1.pdf]

**Table S1 Sequences for primers used in this study**

|                         |                          |
|-------------------------|--------------------------|
| <i>3110043O21Rik-FW</i> | CAGCAGCGGCGAGTGG         |
| <i>3110043O21Rik-RV</i> | TAAGCAAAGGTAGCCGCCAA     |
| <i>0610010O12Rik-FW</i> | CGTGGAGCAGAGAGGTGCAT     |
| <i>0610010O12Rik-RV</i> | TTGGCCCCATTGGCTGTTGT     |
| <i>5730469M10Rik-FW</i> | AACACTGGAGAAAGAACCAAGG   |
| <i>5730469M10Rik-RV</i> | CAGGTCTGCTGCTTCCGC       |
| <i>Ab124611-FW</i>      | CATCACAGTGCTGGTGAGAAAA   |
| <i>Ab124611-RV</i>      | GTTGCCACTGAGTCTTCCTGA    |
| <i>Acbd7-FW</i>         | TGGGAGAGTCACAGCATTCC     |
| <i>Acbd7-RV</i>         | CTTCCGGTCTGCTTTTCAGC     |
| <i>Acer2-FW</i>         | GTGCTTTGGCCATGTGGTTT     |
| <i>Acer2-RV</i>         | ACACACACCACTGCCTTGAA     |
| <i>Adam19-FW</i>        | TGTGTGATTGCGGACAGTGA     |
| <i>Adam19-RV</i>        | TAGCGGAGGGCTACCTTCTT     |
| <i>Apbb2-FW</i>         | TCTCGATGTCCCTTTGCAAGAT   |
| <i>Apbb2-RV</i>         | TGTCCATGCCGACAGGTCT      |
| <i>Alox5-FW</i>         | CGAGTTCCCATGTTACCGCT     |
| <i>Alox5-RV</i>         | GGGGTTCCACTCCATCCATC     |
| <i>Ar-FW</i>            | GTGCCGGACATGACAACAAC     |
| <i>Ar-RV</i>            | CCACATGCAAGTTGCGGAAG     |
| <i>Areg-FW</i>          | CAGCTATTGGCATCGGCATC     |
| <i>Areg-RV</i>          | TCAACTTTTACCCTGCATTGTCTT |
| <i>Arl5c-FW</i>         | GGAGTCAGGAGCACAAAGTCA    |
| <i>Arl5c-RV</i>         | ACCTCATTGGTCAGGAACTGG    |
| <i>Bambi-FW</i>         | GGATCGCCACTCCAGCTACT     |
| <i>Bambi-RV</i>         | GTCTGGAGAAGCAGGCACTAA    |
| <i>Bmp2-FW</i>          | CTAGATCTGTACCGCAGGCA     |
| <i>Bmp2-RV</i>          | GGCCGTTTTCCCACTCATCT     |
| <i>Bmp7-FW</i>          | CAGGACAGCCACTTCCTCAC     |
| <i>Bmp7-RV</i>          | CTCCCGATGGTGGTATCGAG     |
| <i>Bzw2-FW</i>          | CCTAAAGCAATACGCTCCGC     |
| <i>Bzw2-RV</i>          | CCTCTTCGCTCAGAACGTCG     |
| <i>Calca-FW</i>         | CACCGCTCACCAGGAAGG       |
| <i>Calca-RV</i>         | ATGCCTGGTACAGGAGCAAG     |
| <i>Car13-FW</i>         | ACCCGTTATGCTTGCTTCCA     |
| <i>Car13-RV</i>         | AAGAGGCTTCGGAATCTGGC     |
| <i>Ccl1-FW</i>          | AGGATGTTGACAGCAAGAGC     |
| <i>Ccl1-RV</i>          | TAGTTGAGGCGCAGCTTTCTC    |

|                         |                          |
|-------------------------|--------------------------|
| <i>Ccr4-FW</i>          | GGCATTGCTTCATAGACTGTCC   |
| <i>Ccr4-RV</i>          | GTACCAGCAGGAGAAGCCAA     |
| <i>Ccr8-FW</i>          | ACCTCAGAAGAAAGGCTCGC     |
| <i>Ccr8-RV</i>          | GAGGAGGAACTCTGCGTCAC     |
| <i>Cd27-FW</i>          | CTATAGCCAGCGGTCATCCC     |
| <i>Cd27-RV</i>          | CTGCCGGTCTTCATTTGGC      |
| <i>Chd7-FW</i>          | GAAGAATCTGCTGGTTTACGG    |
| <i>Chd7-RV</i>          | GGTGTGATGAGGTCCCAGAT     |
| <i>Csf2-FW</i>          | TCAAGAAGCTAACATGTGTGCAG  |
| <i>Csf2-RV</i>          | ACAGTCCGTTTCCGGAGTTG     |
| <i>Cxcl2-FW</i>         | CAACCACCAGGCTACAGGG      |
| <i>Cxcl2-RV</i>         | GGCTATGACTTCTGTCTGGGC    |
| <i>Cyp2d22-FW</i>       | TTGGACCACGCTCTCAAGGTA    |
| <i>Cyp2d22-RV</i>       | GTCCAGTATGGTCAGCGAAGG    |
| <i>Cyp51-FW</i>         | GCCTATGTGCCATTTGGAGC     |
| <i>Cyp51-RV</i>         | GGGTTTTCTGGGGTGTGGAT     |
| <i>D330045A20Rik-FW</i> | AAGGCCCAAGTGCTAATCCG     |
| <i>D330045A20Rik-RV</i> | CTTGCCACAGCTGACTCTCC     |
| <i>Dgat2-FW</i>         | CCCTACTCCAAGCCCATCAC     |
| <i>Dgat2-RV</i>         | GGCATGGTACAGGTCGATGT     |
| <i>Dhx40-FW</i>         | TGGAAGCTCAACTTCGGGAAC    |
| <i>Dhx40-RV</i>         | ACTTCCACGCCCATCCATTG     |
| <i>Dusp10-FW</i>        | TGTTGCTGCTGGGGATCAAT     |
| <i>Dusp10-RV</i>        | GTGCCACTACTACCCTGTCTG    |
| <i>Ebi3-FW</i>          | CTCCTAGCCTTTGTGGCTGA     |
| <i>Ebi3-RV</i>          | CACCTGGCGGAAGTGAGAG      |
| <i>Emp3-FW</i>          | TCTTCAGCAACTCTCGGCTT     |
| <i>Emp3-RV</i>          | CCACCAACAGGAGGAGTGAC     |
| <i>Fam55d-FW</i>        | ATTCCGAATTGGCTCCAGCA     |
| <i>Fam55d-RV</i>        | TTGTGTTGGCTCCTCACCTG     |
| <i>Fam71f2-FW</i>       | CGGTCCGTTTCCACCTGTA      |
| <i>Fam71f2-RV</i>       | TGGATGTTTCTCGTGGAGCC     |
| <i>Fbxl21-FW</i>        | AGTCAGATGGGTGTCCGGTGA    |
| <i>Fbxl21-RV</i>        | TGGTTCAGTCTGAGTGACGTG    |
| <i>Foxp3-FW</i>         | CCCAGGAAAGACAGCAACCTT    |
| <i>Foxp3-RV</i>         | TTCTCACAACCAGGCCACTTG    |
| <i>Galnt3-FW</i>        | ACCAGGGAGGCAAACCATTG     |
| <i>Galnt3-RV</i>        | TCCTTCTGGATGTTGTGCCG     |
| <i>Gata3-FW</i>         | AGAGGTGGACGTA CTTT TTAAC |

|                  |                          |
|------------------|--------------------------|
| <i>Gata3-RV</i>  | AGAGATCCGTGCAGCAGAG      |
| <i>Gcfc1-FW</i>  | ACATCCCTCAGGTTCAAGCA     |
| <i>Gcfc1-RV</i>  | TCATGGAGTCCAACCTGTCT     |
| <i>Glb1-FW</i>   | GGATGGACAGCCATTCCGAT     |
| <i>Glb1-RV</i>   | CACGGTCCCCAGAAAACCTCA    |
| <i>Grin2d-FW</i> | ACAACCAGCCAAGAGTGGAG     |
| <i>Grin2d-RV</i> | GGGCCATGTAGTTGAGCACT     |
| <i>H2-Oa-FW</i>  | GCCCAGTATCCGCAGGTAAC     |
| <i>H2-Oa-RV</i>  | AGAAGCTTCCAGAAGTCCGC     |
| <i>Hba-a2-FW</i> | TGATGTAAGCCACGGCTCTG     |
| <i>Hba-a2-RV</i> | CAGTGGCTCAGGAGCTTGAA     |
| <i>Hes1-FW</i>   | CAACACGACACCGGACAAAC     |
| <i>Hes1-RV</i>   | GGAATGCCGGGAGCTATCTT     |
| <i>Hlf-FW</i>    | CACGATGGAGAAAATGTCCCG    |
| <i>Hlf-RV</i>    | CTGCTGCTCTCATCGTCCAG     |
| <i>Homer2-FW</i> | CCCACCCAGACTTGGAAATACA   |
| <i>Homer2-RV</i> | TTGGTGCTGGGGTCAATCTG     |
| <i>Hs3st1-FW</i> | ATTTGCTCCAAAGGGCGCAG     |
| <i>Hs3st1-RV</i> | AGGCTCCCTCTTGATTACTGGA   |
| <i>Il4-FW</i>    | AACTCCATGCTTGAAGAAGAACTC |
| <i>Il4-RV</i>    | CCAGGAAGTCTTTCAGTGATGTG  |
| <i>Il10ra-FW</i> | CTCGCTTCACAGTGGATGAA     |
| <i>Il10ra-RV</i> | GTGAGGGTGAAGGTTTCCTG     |
| <i>Il13-FW</i>   | GCAACATCACACAAGACCAGAC   |
| <i>Il13-RV</i>   | GAATCCAGGGCTACACAGAACC   |
| <i>Il17rb-FW</i> | TCCCTCCAGATGACAACAGA     |
| <i>Il17rb-RV</i> | CTTCCTTGCCCTCCAAGTTAGGT  |
| <i>Il1rl1-FW</i> | TCAATTCACACACGCGGAGA     |
| <i>Il1rl1-RV</i> | ATCTGCCACAGGACATCAGC     |
| <i>Il5-FW</i>    | GTTGACAAGCAATGAGACGATGAG |
| <i>Il5-RV</i>    | CCCACGGACCGTTTGATTCTTC   |
| <i>Il9r-FW</i>   | TGGCTCCTCTTTACCAGTAACC   |
| <i>Il9r-RV</i>   | GGTGGGTCCAACCTTGATGTGT   |
| <i>Inpp4b-FW</i> | AGCCCTCACCTGAAAGATGCT    |
| <i>Inpp4b-RV</i> | TAGCCGGTGTTCCCTTCTCTCT   |
| <i>Ipmk-FW</i>   | AAGTGGGCATACTCCAGCAC     |
| <i>Ipmk-RV</i>   | CAGTCAGCAGCGTAAACCAT     |
| <i>Irf4-FW</i>   | TCCAGACCCCTCAGAGACAGA    |
| <i>Irf4-RV</i>   | CGGTGGTAATCTGGAGTGGT     |

|                  |                         |
|------------------|-------------------------|
| <i>Kcnn4-FW</i>  | TCTGCACGCTGAGATGTTGT    |
| <i>Kcnn4-RV</i>  | TCCTTGGCATGGAAGACCAC    |
| <i>Klrg1-FW</i>  | ACATTTCCGGACAACCAGGG    |
| <i>Klrg1-RV</i>  | TGTTCTCAAGCCGATCCAG     |
| <i>Lgmn-FW</i>   | TTGCCAACTCTGAAGAAAACC   |
| <i>Lgmn-RV</i>   | CATCCTCTCCGGTGTAGTCC    |
| <i>Lpcat2-FW</i> | CCCCAGATACTAGTTTTCCAG   |
| <i>Lpcat2-RV</i> | ACACACAGCTGGAGGAATGT    |
| <i>Lrrc33-FW</i> | AGCCTTTGGAGACTGGAAGC    |
| <i>Lrrc33-RV</i> | GAAAACCCAGGCAAAGCCAG    |
| <i>Lrrc52-FW</i> | CCCCTGGATATGCAACTGCT    |
| <i>Lrrc52-RV</i> | GGAGTGGATTCCCCACCTTC    |
| <i>Mboat1-FW</i> | TTCAATGGCATGGACACGGA    |
| <i>Mboat1-RV</i> | TACCAGGGAACCCGCTCATA    |
| <i>Mc5r-FW</i>   | GCCTGGAACCCGTGAAGAAT    |
| <i>Mc5r-RV</i>   | CACTTCTTGGCATCGGATTTACC |
| <i>Med12l-FW</i> | CTACGTATCCTGCAGCCACC    |
| <i>Med12l-RV</i> | GCTTTACTTTTGAACAGGCACT  |
| <i>Mras-FW</i>   | CTTAACGGTGTGCAGCGGA     |
| <i>Mras-RV</i>   | TGGTCGCCATGTTTCTGGTAG   |
| <i>Naip5-FW</i>  | ACGGAGTCTGACCTCTCAA     |
| <i>Naip5-RV</i>  | CTTGCAGGAAGCAAGCACAG    |
| <i>Naip6-FW</i>  | CTCATGACTGCGCTTGCTTC    |
| <i>Naip6-RV</i>  | GAGCCTGGGCAAACCTTTTCTG  |
| <i>Nav2-FW</i>   | GACTACCCAGCTGACTGCAA    |
| <i>Nav2-RV</i>   | AGCCTGATGGTCATGTTTCC    |
| <i>Nck2-FW</i>   | GTCGGGAGTGGTACTATGGC    |
| <i>Nck2-RV</i>   | ACGCTTTGAGAGACACGGAG    |
| <i>Neb-FW</i>    | CCTGACATGCTGAGAGCCAA    |
| <i>Neb-RV</i>    | GGCATTCAAGCCTCTTCCTT    |
| <i>Nfix-FW</i>   | CAAGCGCCCCAAGTCCAT      |
| <i>Nfix-RV</i>   | GCTGCAGAAGTCCAGCTTTC    |
| <i>Nfkb1-FW</i>  | ACTGGAAGCACGGATGACAG    |
| <i>Nfkb1-RV</i>  | ATCTCCTTGGTCTGCTGCAC    |
| <i>Npnt-FW</i>   | AGATGTGTTTCATTCCACGGCA  |
| <i>Npnt-RV</i>   | TGAGATACTGTCCACCTGCTG   |
| <i>Pard3-FW</i>  | AAGAAAGGTACAGAAGGACTGGG |
| <i>Pard3-RV</i>  | GACCTCTATTAGCCGGTCTCC   |
| <i>Pcsk1-FW</i>  | TCTTTGCTCTGGCCTTGGAG    |

|                    |                         |
|--------------------|-------------------------|
| <i>Pcsk1-RV</i>    | TCCAAATCGGCTGTTCACCA    |
| <i>Pdcd1-FW</i>    | GCAGTTGAGCTGGCAATCAG    |
| <i>Pdcd1-RV</i>    | GTGAAGGTGGCATTGCTCC     |
| <i>Pde7b-FW</i>    | AATGGTTGAGAGGTGTGGCG    |
| <i>Pde7b-RV</i>    | ATGAATGGGTAGGAGCCACG    |
| <i>Pdlim1-FW</i>   | GCAGACAACATGACGCTCAC    |
| <i>Pdlim1-RV</i>   | CGGTTGTGGGCACTTCCTAT    |
| <i>Plaur-FW</i>    | CACAAACCTCTGCAACAGGC    |
| <i>Plaur-RV</i>    | TAGGATAGCGGCATTGCAGG    |
| <i>Plk2-FW</i>     | CATCAGAGGGAAAAGATCGAC   |
| <i>Plk2-RV</i>     | TTCTGGCTCTGTCAACACCTT   |
| <i>Pparg-FW</i>    | GGGCTGAGGAGAAGTCACAC    |
| <i>Pparg-RV</i>    | TCAGTGGTTCACCGCTTCTT    |
| <i>Ppp2r3a-FW</i>  | GAGCAGCGGGCACTGAG       |
| <i>Ppp2r3a-RV</i>  | ATAACTGAGTCCTCCCAGGC    |
| <i>Ptgir-FW</i>    | TCCGTCACTCTCAGCCTCTAT   |
| <i>Ptgir-RV</i>    | AGTGAAGCCTCGGATCATGAGA  |
| <i>Ptpn13-FW</i>   | CGACTATGATGGGTCTCCGC    |
| <i>Ptpn13-RV</i>   | TTCACCGTCTGTTGTCTCCG    |
| <i>Ptpn9-FW</i>    | TCGTCGTGAGAACCCTGTTG    |
| <i>Ptpn9-RV</i>    | CTCGGGTTTGGTCTAGGCAG    |
| <i>Rab4a-FW</i>    | GGAGTGGAAATTTGGCTCAAAGA |
| <i>Rab4a-RV</i>    | GTAAGCGCATTGTAGGTTTCTCG |
| <i>Rnf128-FW</i>   | GGACAAGATCCATCTGGCTTCA  |
| <i>Rnf128-RV</i>   | TGATTGCAACAATGTCCCCAG   |
| <i>Rplp1-FW</i>    | GTCCTTCCGAGGAAGCTAAGG   |
| <i>Rplp1-RV</i>    | CATTGATCTTATCCTCCGTGACC |
| <i>Rps19-FW</i>    | CACAGTCAAGCTGGCCAAAC    |
| <i>Rps19-RV</i>    | TCTGACACCGTTTCTCTGCC    |
| <i>Serpine1-FW</i> | CAATGGAAGGGCAACATGACC   |
| <i>Serpine1-RV</i> | GCCTGTGCTACAGAGAGCTG    |
| <i>Spes3-FW</i>    | CACGGGCCCTAGAGAAAGAA    |
| <i>Spes3-RV</i>    | TCCCAAAGGACAACCTGGTTCA  |
| <i>Spry1-FW</i>    | CTCTGCGGGCTAAGGAGC      |
| <i>Spry1-RV</i>    | TTCCAGCAGTCAGCGGAAAT    |
| <i>Stab2-FW</i>    | CTGTGAGACCTGCACAGAGG    |
| <i>Stab2-RV</i>    | TGTCACACTTCACTCCTCGC    |
| <i>Stxbp6-FW</i>   | CCTGTCTTCGGTTGGGACG     |
| <i>Stxbp6-RV</i>   | GATGGCAGACTTGGCACTCA    |

|                   |                       |
|-------------------|-----------------------|
| <i>Taf1d-FW</i>   | CTTGTCCTAGTCCGGCTGCT  |
| <i>Taf1d-RV</i>   | GCTGCCATCAGAGGAGTCAT  |
| <i>Tanc2-FW</i>   | CAACCTCTCTCGATGTCGCA  |
| <i>Tanc2-RV</i>   | TTGCCCTTGCTCTCGCATAG  |
| <i>Tgm2-FW</i>    | TAAGAGTGTGGGCCGTGATG  |
| <i>Tgm2-RV</i>    | TTTGTTCAAGGTGGTTGGCCT |
| <i>Tph1-FW</i>    | TCCTCCGAAAGAGGGAGAGT  |
| <i>Tph1-RV</i>    | TCCGGGACTCGATGTGTAAC  |
| <i>Tspan13-FW</i> | TGTTGGTGGCATTGGTCTCT  |
| <i>Tspan13-RV</i> | GCGAGGGTCTTTCTGGTCC   |
| <i>Ube2e2-FW</i>  | CGCGAAACTGTCAACCAGTG  |
| <i>Ube2e2-RV</i>  | CAGCACTACAGTTGGGAGGG  |
| <i>Ube2l6-FW</i>  | CAACGTCAGGGAGGATGGTC  |
| <i>Ube2l6-RV</i>  | ACTCACCAGCACATTGAGGG  |
| <i>Unc5b-FW</i>   | TGCGTGCTGAATCAGAGAACT |
| <i>Unc5b-RV</i>   | ACCGCTACCACCACAAAGAC  |
| <i>Zc3h12c-FW</i> | GACCCACGGCTGTGATCCTG  |
| <i>Zc3h12c-RV</i> | GTTCCGTGCACTTGACTCCA  |

**Table S2 Differentially expressed genes between ILC2<sub>17</sub> and IL-17<sup>-</sup>ILC2.**

|                      | Relative expression: Ratio of ILC2 <sub>17</sub> /IL-17 <sup>-</sup> ILC2 (Log <sub>1.5</sub> ) |          |          |          |          |
|----------------------|-------------------------------------------------------------------------------------------------|----------|----------|----------|----------|
|                      | Sample1                                                                                         | Sample2  | Sample3  | Sample4  | average  |
| <i>Il17rb</i>        | 2.540975                                                                                        | 3.36943  | 2.13414  | 1.120789 | 2.291334 |
| <i>Lgmn</i>          | 2.722714                                                                                        | 2.766995 | 1.262573 | 1.743606 | 2.123972 |
| <i>Pdcd1</i>         | -2.30468                                                                                        | -2.36349 | -1.43054 | -1.18492 | -1.82091 |
| <i>3110043O21Rik</i> | -2.04925                                                                                        | -2.53894 | -2.4717  | -1.52509 | -2.14625 |
| <i>Grin2d</i>        | -3.87456                                                                                        | -1.67166 | -2.12437 | -1.71466 | -2.34631 |
| <i>Mboat1</i>        | -2.49392                                                                                        | -2.51325 | -2.73336 | -1.67177 | -2.35307 |
| <i>Ab124611</i>      | -1.82225                                                                                        | -4.53893 | -1.65387 | -1.46559 | -2.37016 |
| <i>Nfix</i>          | -1.73405                                                                                        | -2.99037 | -2.91961 | -1.85328 | -2.37433 |
| <i>Fam71f2</i>       | -2.6955                                                                                         | -3.22526 | -2.61147 | -1.90913 | -2.61034 |
| <i>Alox5</i>         | -3.65807                                                                                        | -3.8813  | -2.79934 | -2.70094 | -3.25991 |
| <i>5730469M10Rik</i> | -3.25209                                                                                        | -1.73198 | -4.52508 | -4.13671 | -3.41146 |
| <i>Apbb2</i>         | -4.68719                                                                                        | -4.09895 | -1.74913 | -3.24809 | -3.44584 |
| <i>Csf2</i>          | -5.1029                                                                                         | -4.75797 | -3.08911 | -2.49184 | -3.86045 |
| <i>Tgm2</i>          | -8.42454                                                                                        | -4.05204 | -2.24474 | -4.19655 | -4.72947 |
| <i>Foxp3</i>         | -9.14956                                                                                        | -6.71182 | -8.42492 | -8.81883 | -8.27628 |

Figure S1

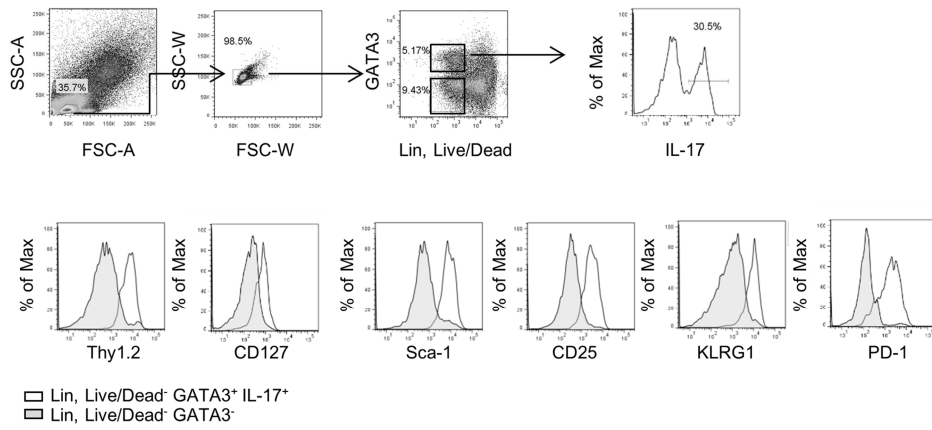



Figure S2

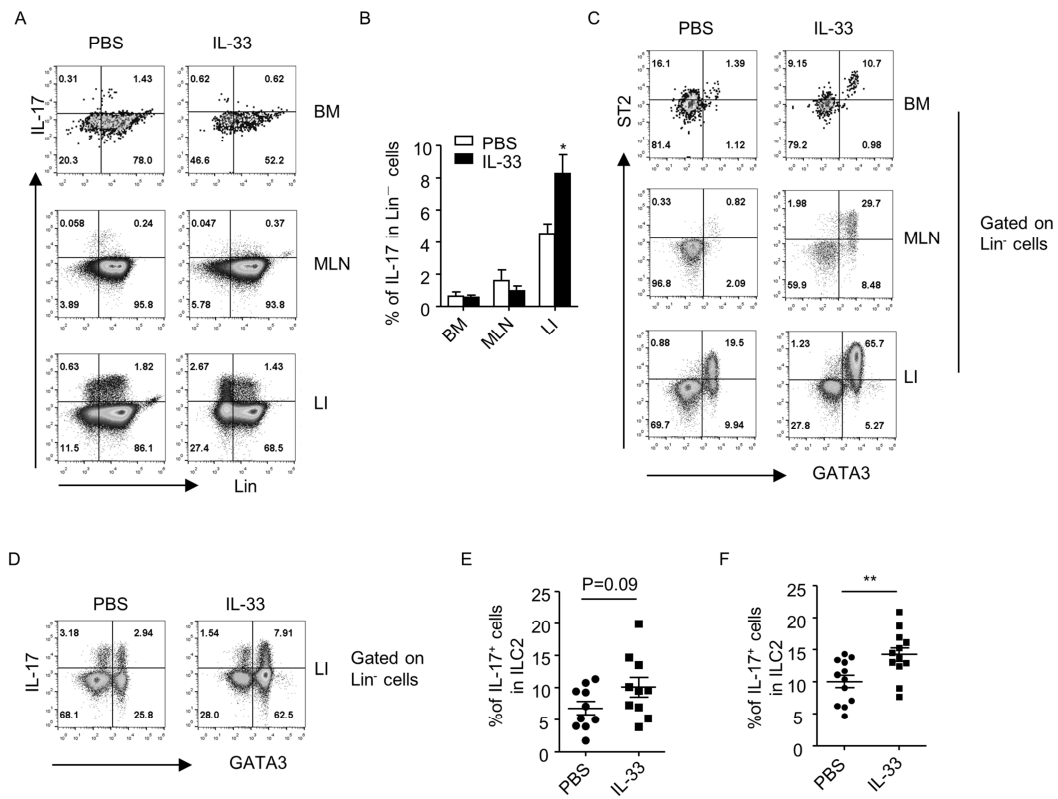

Figure S3

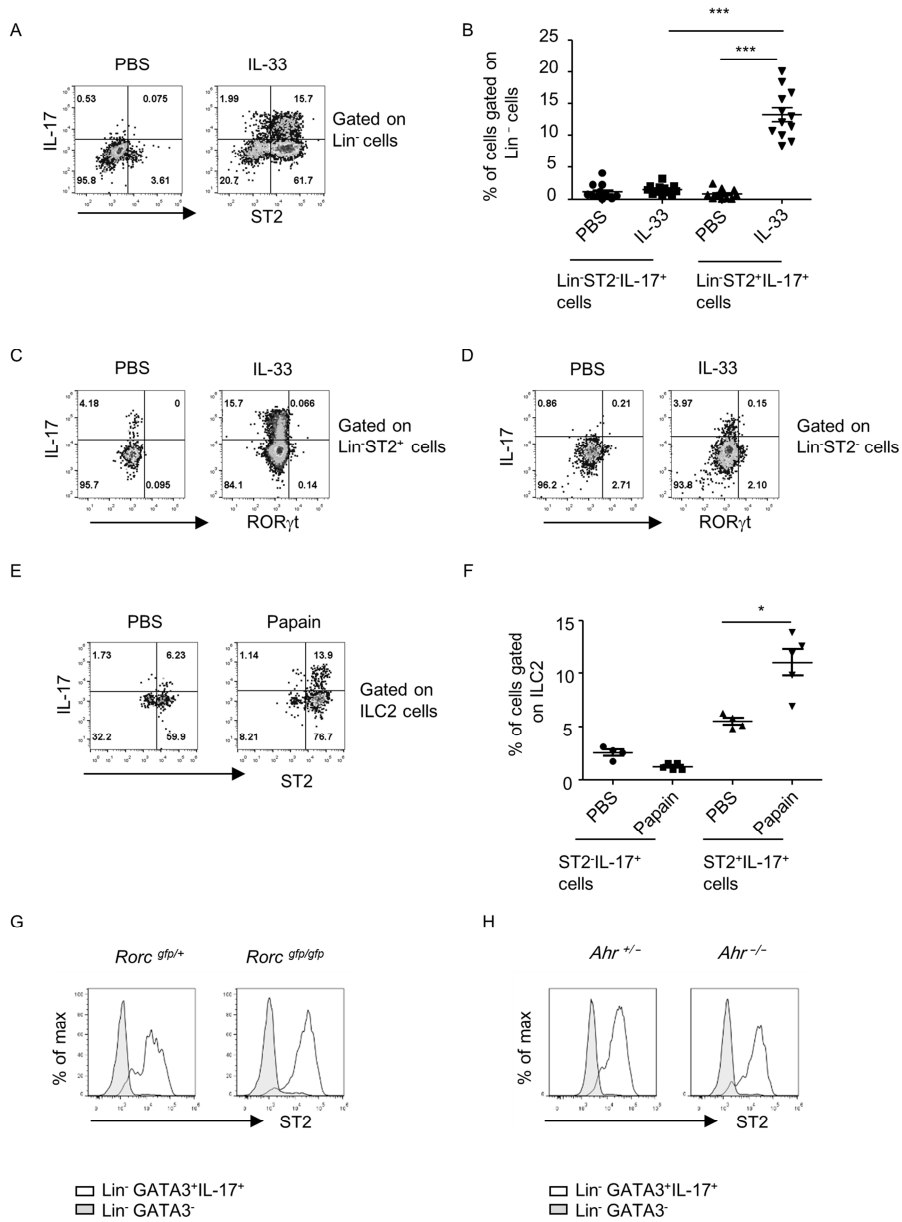

Figure S4

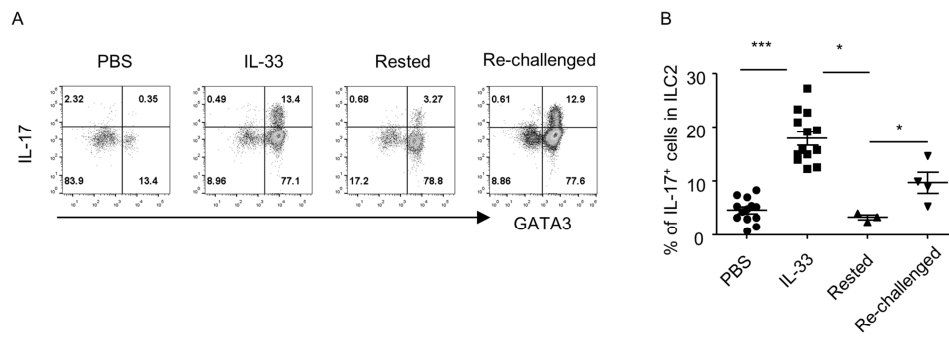

A

Figure S5

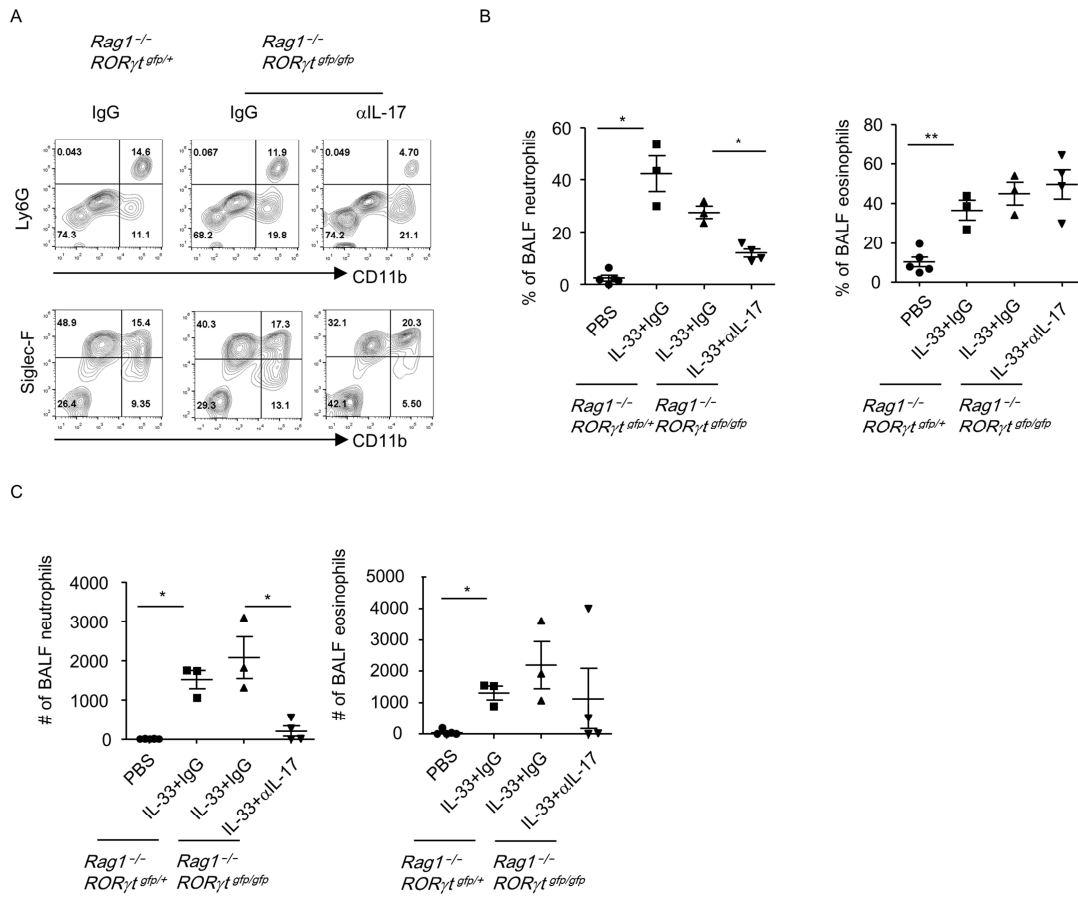

Figure S6

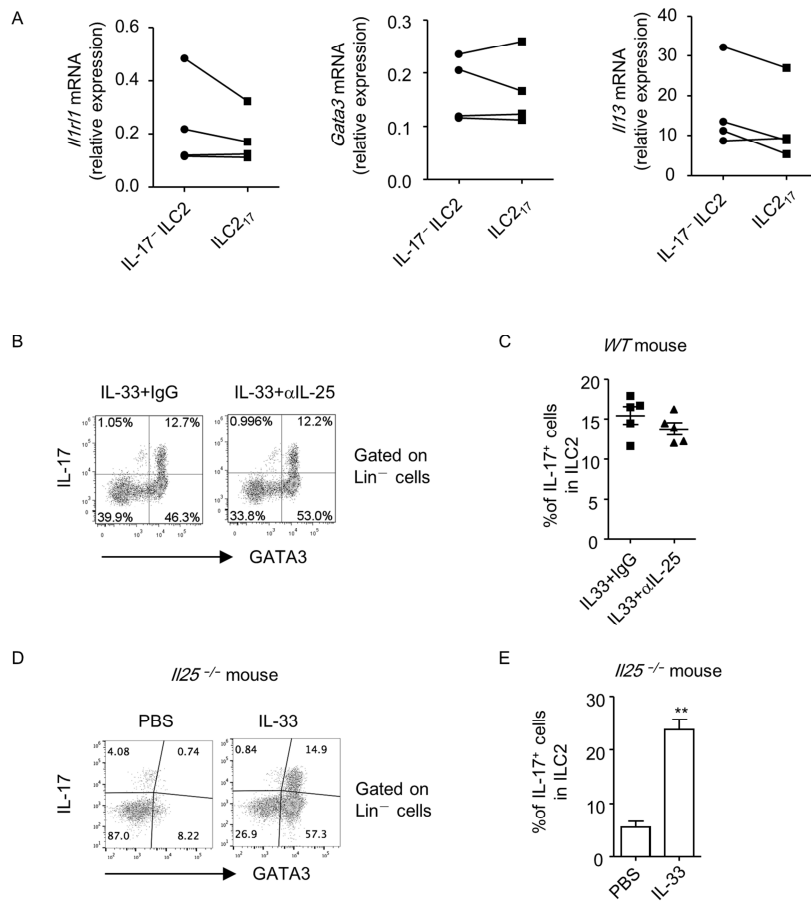

## Online Repository

IL-17-producing-ST2<sup>+</sup>ILC2 plays a pathogenic role in lung inflammation

Ting Cai, Jinxin Qiu, Yan Ji, Wenjing Li, Zhaoyun Ding, Caixia Suo, Jiali Chang, Jingjing Wang, Rui He, Youcun Qian, Xiaohuan Guo, Liang Zhou, Huiming Sheng, Lei Shen, and Ju Qiu

Figure Legends:

- Figure S1 Gating strategy for characterization of IL-33-induced IL-17<sup>+</sup>ILC2s
- Figure S2 IL-33 induces IL-17<sup>+</sup>ILC2s in the large intestine of *Rag1*<sup>-/-</sup> mouse
- Figure S3 Lung inflammation promotes IL-17 production from ST2<sup>+</sup>RORγt<sup>-</sup> ILC2s
- Figure S4 Sustained signal of IL-33 is required for the maintenance of ILC2<sub>17</sub>s
- Figure S5 Endogenous IL-17 triggered by IL-33 exacerbates lung inflammation independently of RORγt
- Figure S6 Gene expression in ILC2<sub>17</sub>s compared to IL-17 ILC2s and independency of induction of ILC2<sub>17</sub> on IL-25
- Supplemental figure legends
- Table S1 Sequences for primers used in this study
- Table S2 Differentially expressed genes between ILC2<sub>17</sub> and IL-17 ILC2s
